# Supplementary material for: High-throughput ESI-MS analysis of binding between the Bombyx mori pheromone-binding protein BmorPBP1, its pheromone components and some analogues
Source: Royal Society of Chemistry journal article supplement (doi:10.1039/b914294k), 2009-01-01
Supplement: b914294k.pdf [file b914294k.pdf]

**Selected Synapt HDMS tune parameters:**

(running MassLynx 4.1 SCN639)

Capillary 2.1 kV

Sampling cone 10V

Extraction cone 2V

Source temperature 25°C

Cone gas flow 25 l/min

Tof 9.10 kV

Reflectron 2.16 kV

Pusher interval 90 microsec

Pusher offset -2.25

Detector 1600 V

TriWave OFF

EDC OFF
